# Supplementary material for: Subjective Importance of a Common Feature Decides Its Consideration in Multi-attribute Decision-making
Source: Front Psychol. 2021 Jan 14;11:583999. doi: 10.3389/fpsyg.2020.583999 (PMC7841338; doi:10.3389/fpsyg.2020.583999)
Supplement: Supplementary file 1 [file Data_Sheet_1.XLSX]

## Sheet: Exp1
id	gender	Mouselab_data	T_Low	T_High	P_Low	P_High	M_Low	M_High	dT	dP	dM	T_Avg	P_Avg	M_Avg	Relative_Importance_of_M	Relative_Importance_of_P	Relative_Importance_of_T	T_Low_Box_Open_Count	T_Low_Box_Open_Count_Total	T_High_Box_Open_Count	T_High_Box_Open_Count_Total	P_Low_Box_Open_Count	P_Low_Box_Open_Count_Total	P_High_Box_Open_Count	P_High_Box_Open_Count_Total	M_Low_Box_Open_Count	M_Low_Box_Open_Count_Total	M_High_Box_Open_Count	M_High_Box_Open_Count_Total	T_Low_Relative_Frequency	T_High_Relative_Frequency	P_Low_Relative_Frequency	P_High_Relative_Frequency	M_Low_Relative_Frequency	M_High_Relative_Frequency	Avg_T_Relative_Frequency	Avg_P_Relative_Frequency	Avg_M_Relative_Frequency	filter_$
1	2	1	8	8	2	2	2	2	0	0	0	8	2	2	0.255317	0.64336	0.101323	3	13	2	10	2	8	2	10	2	7	2	6	0.230769	0.2	0.25	0.2	0.25	0.2	0.215385	0.225	0.225	1
2	2	0	3	3	9	3	7	1	0	6	6	3	6	4	0.379259	0.289428	0.331313	0	#NULL!	0	#NULL!	0	#NULL!	0	#NULL!	0	#NULL!	0	#NULL!	0	0	0	0	0	0	0	0	0	0
3	1	0	5	5	8	5	8	5	0	3	3	5	6.5	6.5	0.222222	0.222222	0.555556	0	#NULL!	0	#NULL!	0	#NULL!	0	#NULL!	0	#NULL!	0	#NULL!	0	0	0	0	0	0	0	0	0	0
4	2	1	7	6	4	6	4	3	1	2	1	6.5	5	3.5	0.222222	0.555556	0.222222	4	13	6	14	6	19	5	16	5	10	3	16	0.307692	0.428571	0.315789	0.3125	0.263158	0.1875	0.368132	0.314145	0.225329	1
5	2	1	6	6	7	3	3	3	0	4	0	6	5	3	0.240211	0.549946	0.209844	2	8	3	16	4	12	1	5	2	6	3	11	0.25	0.1875	0.333333	0.2	0.166667	0.6	0.21875	0.266667	0.383333	1
6	2	1	7	7	3	2	1	2	0	1	1	7	2.5	1.5	0.274665	0.621249	0.104086	3	10	3	13	5	16	5	11	2	9	4	10	0.3	0.230769	0.3125	0.454545	0.125	0.363636	0.265385	0.383523	0.244318	1
7	1	0	7	8	8	6	2	8	1	2	6	7.5	7	5	0.133638	0.444308	0.422054	0	#NULL!	0	#NULL!	0	#NULL!	0	#NULL!	0	#NULL!	0	#NULL!	0	0	0	0	0	0	0	0	0	0
8	2	1	7	6	4	3	2	4	1	1	2	6.5	3.5	3	0.288325	0.564377	0.147298	5	11	2	12	2	10	5	13	3	6	4	9	0.454545	0.166667	0.2	0.384615	0.3	0.307692	0.310606	0.292308	0.303846	1
9	2	1	5	6	5	3	4	4	1	2	0	5.5	4	4	0.346894	0.454559	0.198547	5	21	2	15	3	19	7	22	4	22	3	10	0.238095	0.133333	0.157895	0.318182	0.210526	0.136364	0.185714	0.238038	0.173445	1
10	2	1	5	8	2	4	5	3	3	2	2	6.5	3	4	0.319793	0.514595	0.165612	4	23	0	7	2	8	3	14	7	22	5	10	0.173913	0	0.25	0.214286	0.875	0.357143	0.0869565	0.232143	0.616071	1
11	2	1	8	8	8	8	2	2	0	0	0	8	8	2	0.101323	0.64336	0.255317	3	10	2	6	4	9	4	10	5	18	1	5	0.3	0.333333	0.444444	0.4	0.555556	0.1	0.316667	0.422222	0.327778	1
12	2	1	7	6	1	6	2	3	1	5	1	6.5	3.5	2.5	0.282014	0.581129	0.136857	3	12	2	8	4	13	5	10	4	14	2	9	0.25	0.25	0.307692	0.5	0.307692	0.2	0.25	0.403846	0.253846	1
13	2	1	4	7	7	5	6	5	3	2	1	5.5	6	5.5	0.221125	0.318917	0.459958	2	14	3	14	#NULL!	#NULL!	2	24	6	29	0	#NULL!	0.142857	0.214286	#NULL!	0.0833333	#NULL!	0	0.178571	0.0833333	0	1
14	2	1	7	7	4	4	3	4	0	0	1	7	4	3.5	0.255746	0.57305	0.171205	2	8	2	6	4	11	4	8	2	9	1	6	0.25	0.333333	0.363636	0.5	0.181818	0.125	0.291667	0.431818	0.153409	1
15	2	0	9	9	8	8	6	6	0	0	0	9	8	6	0.0988839	0.364292	0.536825	0	#NULL!	0	#NULL!	0	#NULL!	0	#NULL!	0	#NULL!	0	#NULL!	0	0	0	0	0	0	0	0	0	0
16	2	1	7	6	4	5	4	4	1	1	0	6.5	4.5	4	0.259776	0.52667	0.213554	2	13	2	9	6	18	8	22	3	7	2	6	0.153846	0.222222	0.333333	0.363636	0.166667	0.0909091	0.188034	0.348485	0.128788	1
17	2	1	7	7	1	1	2	2	0	0	0	7	1	2	0.30848	0.595668	0.0958519	1	12	4	17	2	5	4	8	2	5	3	6	0.0833333	0.235294	0.4	0.5	0.4	0.375	0.159314	0.45	0.3875	1
18	2	1	6	6	3	5	4	3	0	2	1	6	4	3.5	0.30351	0.518996	0.177494	3	25	2	5	3	8	2	11	1	11	18	30	0.12	0.4	0.375	0.181818	0.125	1.63636	0.26	0.278409	0.880682	1
19	2	1	6	6	4	4	3	3	0	0	0	6	4	3	0.296961	0.539615	0.163424	3	16	2	13	3	11	3	12	2	7	3	13	0.1875	0.153846	0.272727	0.25	0.181818	0.25	0.170673	0.261364	0.215909	1
20	2	1	6	6	1	1	3	1	0	0	2	6	1	2	0.364292	0.536825	0.0988839	3	17	2	6	2	8	3	7	2	6	2	6	0.176471	0.333333	0.25	0.428571	0.25	0.285714	0.254902	0.339286	0.267857	1
21	2	1	6	7	6	3	3	7	1	3	4	6.5	4.5	5	0.274356	0.44148	0.284163	8	28	2	11	6	14	2	7	4	12	4	10	0.285714	0.181818	0.428571	0.285714	0.285714	0.571429	0.233766	0.357143	0.428571	1
22	2	1	6	7	3	7	3	2	1	4	1	6.5	5	2.5	0.213191	0.596236	0.190572	0	5	2	11	2	9	2	8	2	6	3	6	0	0.181818	0.222222	0.25	0.222222	0.375	0.0909091	0.236111	0.298611	1
23	2	1	7	6	3	3	5	6	1	0	1	6.5	3	5.5	0.34933	0.389755	0.260915	3	12	4	17	9	30	3	8	9	22	7	22	0.25	0.235294	0.3	0.375	0.3	0.875	0.242647	0.3375	0.5875	1
24	1	1	6	6	4	4	4	4	0	0	0	6	4	4	0.310814	0.493386	0.1958	5	19	2	6	11	25	7	20	2	8	2	7	0.263158	0.333333	0.44	0.35	0.08	0.1	0.298246	0.395	0.09	1
25	2	1	7	8	3	1	2	2	1	2	0	7.5	2	2	0.271386	0.625603	0.103011	1	6	0	4	3	9	2	6	2	8	2	5	0.166667	0	0.333333	0.333333	0.222222	0.333333	0.0833333	0.333333	0.277778	1
26	1	1	6	6	6	4	3	3	0	2	0	6	5	3	0.240211	0.549946	0.209844	1	6	1	5	6	9	6	16	3	12	0	4	0.166667	0.2	0.666667	0.375	0.333333	0	0.183333	0.520833	0.166667	1
27	2	1	5	8	5	2	3	2	3	3	1	6.5	3.5	2.5	0.282014	0.581129	0.136857	2	6	0	3	2	6	2	12	2	6	2	6	0.333333	0	0.333333	0.166667	0.333333	0.166667	0.166667	0.25	0.25	1
28	1	1	8	4	9	5	1	1	4	4	0	6	7	1	0.155099	0.607193	0.237708	2	19	4	20	5	29	3	9	6	21	2	6	0.105263	0.2	0.172414	0.333333	0.206897	0.222222	0.152632	0.252874	0.214559	1
29	1	1	7	6	4	4	3	3	1	0	0	6.5	4	3	0.270168	0.569672	0.16016	3	14	3	11	4	18	3	10	2	6	3	7	0.214286	0.272727	0.222222	0.3	0.111111	0.3	0.243506	0.261111	0.205556	1
30	2	1	7	6	3	4	3	3	1	1	0	6.5	3.5	3	0.288325	0.564377	0.147298	1	5	2	5	2	7	2	8	1	3	3	6	0.2	0.4	0.285714	0.25	0.142857	0.375	0.3	0.267857	0.258929	1
31	2	1	6	6	5	4	4	4	0	1	0	6	4.5	4	0.284876	0.497724	0.217401	0	5	0	2	3	10	5	14	2	8	0	#NULL!	0	0	0.3	0.357143	0.2	0	0	0.328571	0.1	1
32	2	1	6	5	4	3	4	3	1	1	1	5.5	3.5	3.5	0.361238	0.473356	0.165406	2	13	2	8	2	7	2	11	2	9	2	5	0.153846	0.25	0.285714	0.181818	0.285714	0.181818	0.201923	0.233766	0.233766	1
33	2	1	2	8	2	8	1	2	6	6	1	5	5	1.5	0.307062	0.506948	0.18599	2	11	2	7	3	9	4	14	5	11	4	11	0.181818	0.285714	0.333333	0.285714	0.555556	0.285714	0.233766	0.309524	0.420635	1
34	2	1	8	5	6	4	6	5	3	2	1	6.5	5	5.5	0.240225	0.386558	0.373217	4	14	2	6	6	24	5	15	3	8	4	11	0.285714	0.333333	0.25	0.333333	0.125	0.266667	0.309524	0.291667	0.195833	1
35	2	1	7	7	2	2	2	3	0	0	1	7	2	2.5	0.297044	0.590978	0.111978	1	7	0	6	2	6	3	10	2	12	3	5	0.142857	0	0.333333	0.3	0.333333	0.3	0.0714286	0.316667	0.316667	1
36	2	1	4	4	4	2	2	4	0	2	2	4	3	3	0.527836	0.332516	0.139648	2	8	2	9	3	7	4	8	3	7	2	6	0.25	0.222222	0.428571	0.5	0.428571	0.25	0.236111	0.464286	0.339286	1
37	2	1	6	6	2	1	1	4	0	1	3	6	1.5	2.5	0.361757	0.528107	0.110136	4	13	2	7	3	8	4	11	2	6	2	5	0.307692	0.285714	0.375	0.363636	0.25	0.181818	0.296703	0.369318	0.215909	1
38	2	0	9	7	7	7	3	3	2	0	0	8	7	3	0.117221	0.614411	0.268369	0	#NULL!	0	#NULL!	0	#NULL!	0	#NULL!	0	#NULL!	0	#NULL!	0	0	0	0	0	0	0	0	0	0
39	2	1	5	5	4	1	1	3	0	3	2	5	2.5	2	0.431259	0.450888	0.117853	0	5	3	11	6	19	3	9	3	9	2	4	0	0.272727	0.315789	0.333333	0.157895	0.222222	0.136364	0.324561	0.190058	1
40	2	1	8	7	2	2	2	2	1	0	0	7.5	2	2	0.271386	0.625603	0.103011	2	7	2	6	2	6	3	7	2	6	2	6	0.285714	0.333333	0.333333	0.428571	0.333333	0.285714	0.309524	0.380952	0.309524	1
41	1	1	3	6	6	3	7	3	3	3	4	4.5	4.5	5	0.428571	0.285714	0.285714	2	11	2	13	3	14	2	18	4	25	3	12	0.181818	0.153846	0.214286	0.111111	0.285714	0.166667	0.167832	0.162698	0.22619	1
42	2	1	8	7	7	8	2	3	1	1	1	7.5	7.5	2.5	0.116019	0.616531	0.26745	0	#NULL!	2	5	4	11	4	8	0	4	1	4	0	0.4	0.363636	0.5	0	0.125	0.2	0.431818	0.0625	1
43	1	1	9	9	1	1	1	1	0	0	0	9	1	1	0.234411	0.685422	0.0801674	0	2	2	10	3	5	2	8	2	8	0	#NULL!	0	0.2	0.6	0.25	0.4	0	0.1	0.425	0.2	1
44	1	1	8	8	2	1	1	2	0	1	1	8	1.5	1.5	0.258225	0.650685	0.0910902	2	13	2	7	2	8	5	11	3	11	5	17	0.153846	0.285714	0.25	0.454545	0.375	0.454545	0.21978	0.352273	0.414773	1
45	2	1	6	6	6	6	4	4	0	0	0	6	6	4	0.1958	0.493386	0.310814	2	11	0	4	3	9	2	5	2	8	1	3	0.181818	0	0.333333	0.4	0.222222	0.2	0.0909091	0.366667	0.211111	1
46	1	1	5	4	3	1	1	4	1	2	3	4.5	2	2.5	0.510659	0.37274	0.116602	2	8	2	6	3	12	3	7	6	14	1	4	0.25	0.333333	0.25	0.428571	0.5	0.142857	0.291667	0.339286	0.321429	1
47	2	1	8	8	6	1	2	3	0	5	1	8	3.5	2.5	0.227972	0.642633	0.129395	2	13	2	9	5	10	2	10	2	6	5	13	0.153846	0.222222	0.5	0.2	0.2	0.5	0.188034	0.35	0.35	1
48	2	1	6	6	4	2	2	3	0	2	1	6	3	2.5	0.325729	0.544325	0.129946	2	8	3	16	2	6	2	5	2	6	3	8	0.25	0.1875	0.333333	0.4	0.333333	0.6	0.21875	0.366667	0.466667	1
49	2	1	4	6	2	8	3	2	2	6	1	5	5	2.5	0.314769	0.477913	0.207318	2	13	0	5	8	15	2	12	3	14	4	16	0.153846	0	0.533333	0.166667	0.2	0.333333	0.0769231	0.35	0.266667	1
50	2	1	5	6	5	7	5	3	1	2	2	5.5	6	4	0.221125	0.459958	0.318917	3	7	3	8	2	6	4	12	1	3	2	4	0.428571	0.375	0.333333	0.333333	0.166667	0.166667	0.401786	0.333333	0.166667	1
51	2	1	9	7	2	3	8	3	2	1	5	8	2.5	5.5	0.308823	0.447744	0.243434	2	11	1	6	3	31	2	8	1	3	1	2	0.181818	0.166667	0.0967742	0.25	0.0322581	0.125	0.174242	0.173387	0.078629	1
52	2	1	7	5	6	5	5	5	2	1	0	6	5.5	5	0.22381	0.406689	0.369501	3	6	3	3	0	2	0	2	0	#NULL!	0	16	0.5	1	0	0	0	0	0.75	0	0	1
53	2	1	7	7	4	3	2	2	0	1	0	7	3.5	2	0.254704	0.619665	0.125631	2	7	2	22	2	5	2	8	1	3	1	7	0.285714	0.0909091	0.4	0.25	0.2	0.125	0.188312	0.325	0.1625	1
54	1	1	6	6	4	4	4	4	0	0	0	6	4	4	0.310814	0.493386	0.1958	0	7	1	3	2	8	3	19	2	10	2	7	0	0.333333	0.25	0.157895	0.25	0.105263	0.166667	0.203947	0.177632	1
55	2	1	8	6	7	1	4	4	2	6	0	7	4	4	0.263074	0.547216	0.189709	1	4	0	2	3	9	2	7	1	3	1	3	0.25	0	0.333333	0.285714	0.111111	0.142857	0.125	0.309524	0.126984	1
56	2	1	9	9	1	1	1	2	0	0	1	9	1	1.5	0.239388	0.675817	0.0847957	1	4	3	8	2	5	0	8	3	5	0	3	0.25	0.375	0.4	0	0.6	0	0.3125	0.2	0.3	1
57	2	1	9	7	3	8	1	1	2	5	0	8	5.5	1	0.139882	0.689959	0.170159	3	13	3	14	3	13	7	22	3	11	3	6	0.230769	0.214286	0.230769	0.318182	0.230769	0.136364	0.222527	0.274476	0.183566	1
58	2	1	8	8	2	1	8	8	0	1	0	8	1.5	8	0.346503	0.333162	0.320335	2	28	3	9	2	14	3	14	2	12	0	7	0.0714286	0.333333	0.142857	0.214286	0.142857	0	0.202381	0.178571	0.0714286	1
59	2	1	8	8	8	8	2	2	0	0	0	8	8	2	0.101323	0.64336	0.255317	2	15	2	10	5	16	4	10	2	11	2	6	0.133333	0.2	0.3125	0.4	0.125	0.2	0.166667	0.35625	0.1625	1
60	2	1	9	5	5	2	5	3	4	3	2	7	3.5	4	0.281498	0.543566	0.174936	2	12	2	6	2	9	1	3	2	12	4	12	0.166667	0.333333	0.222222	0.333333	0.222222	1.33333	0.25	0.277778	0.777778	1
61	2	1	7	5	8	2	3	2	2	6	1	6	5	2.5	0.235851	0.568434	0.195715	6	17	3	9	4	9	3	16	9	17	6	11	0.352941	0.333333	0.444444	0.1875	1	0.375	0.343137	0.315972	0.6875	1
62	2	1	6	6	7	3	3	3	0	4	0	6	5	3	0.240211	0.549946	0.209844	4	23	6	17	2	9	5	19	3	15	2	6	0.173913	0.352941	0.222222	0.263158	0.333333	0.105263	0.263427	0.24269	0.219298	1
63	2	1	8	5	6	6	8	2	3	0	6	6.5	6	5	0.182641	0.423872	0.393488	2	16	2	8	4	15	3	9	2	16	2	17	0.125	0.25	0.266667	0.333333	0.133333	0.222222	0.1875	0.3	0.177778	1
64	2	1	9	5	5	5	3	5	4	0	2	7	5	4	0.209844	0.549946	0.240211	3	7	3	10	3	10	2	7	3	9	2	5	0.428571	0.3	0.3	0.285714	0.3	0.285714	0.364286	0.292857	0.292857	1
65	1	1	8	8	1	2	1	2	0	1	1	8	1.5	1.5	0.258225	0.650685	0.0910902	2	7	2	9	4	12	6	22	0	5	3	12	0.285714	0.222222	0.333333	0.272727	0	0.136364	0.253968	0.30303	0.0681818	1
66	1	0	3	6	4	2	4	2	3	2	2	4.5	3	3	0.486775	0.371479	0.141746	0	#NULL!	0	#NULL!	4	8	1	6	2	8	0	#NULL!	0	0	0.5	0.166667	0.25	0	0	0.333333	0.125	0
67	1	1	8	8	8	3	2	2	0	5	0	8	5.5	2	0.145154	0.66464	0.190206	3	7	2	7	2	8	3	14	3	16	0	2	0.428571	0.285714	0.25	0.214286	0.375	0	0.357143	0.232143	0.1875	1
68	2	1	6	6	4	4	4	4	0	0	0	6	4	4	0.310814	0.493386	0.1958	2	14	3	10	3	13	3	14	4	12	3	8	0.142857	0.3	0.230769	0.214286	0.307692	0.214286	0.221429	0.222527	0.260989	1
69	1	1	8	7	3	2	3	2	1	1	1	7.5	2.5	2.5	0.26745	0.616531	0.116019	1	18	0	4	1	12	2	10	2	12	3	11	0.0555556	0	0.0833333	0.2	0.166667	0.3	0.0277778	0.141667	0.233333	1
70	2	1	7	7	4	4	2	4	0	0	2	7	4	3	0.249311	0.593634	0.157056	1	8	1	6	3	8	4	6	6	13	3	8	0.125	0.166667	0.375	0.666667	0.75	0.5	0.145833	0.520833	0.625	1
71	2	1	7	8	3	3	3	4	1	0	1	7.5	3	3.5	0.269752	0.585172	0.145075	0	4	5	12	2	6	5	11	2	7	2	4	0	0.416667	0.333333	0.454545	0.333333	0.181818	0.208333	0.393939	0.257576	1
72	2	1	6	7	4	2	2	4	1	2	2	6.5	3	3	0.303544	0.559132	0.137324	3	9	3	11	2	7	4	15	2	8	2	6	0.333333	0.272727	0.285714	0.266667	0.285714	0.133333	0.30303	0.27619	0.209524	1
73	2	1	8	6	5	7	3	5	2	2	2	7	6	4	0.163424	0.539615	0.296961	3	9	4	15	5	10	9	20	5	18	5	12	0.333333	0.266667	0.5	0.45	0.5	0.25	0.3	0.475	0.375	1
